1 **RNA polymerases display collaborative and antagonistic group behaviors over**  
2 **long distances through DNA supercoiling**

3

4

5 Sangjin Kim<sup>1,2,3</sup>, Bruno Beltran<sup>1,3,&</sup>, Irnov Irnov<sup>1,2,3,#</sup> and Christine Jacobs-Wagner<sup>1,2,3,4\*</sup>

6

7 <sup>1</sup> Microbial Sciences Institute, Yale University, West Haven, CT 06516 USA

8 <sup>2</sup> Department of Molecular, Cellular and Developmental Biology, Yale University, New  
9 Haven, CT 06511 USA

10 <sup>3</sup> Howard Hughes Medical Institute, Yale University, New Haven, CT 06536 USA

11 <sup>4</sup> Department of Microbial Pathogenesis, Yale School of Medicine, New Haven, CT  
12 06536 USA

13 & Present address: Biophysics Program, Stanford University, Stanford, CA 94305 USA

14 # Present address: Department of Microbiology, New York University School of Medicine,  
15 New York, NY 10016 USA

16 \*Corresponding author and lead contact: [christine.jacobs-wagner@yale.edu](mailto:christine.jacobs-wagner@yale.edu), tel: +1-  
17 203-737-6778, fax: +1-203-737-6715.

18

19

## 20 **SUMMARY**

21 Transcription by RNA polymerases (RNAPs) is essential for cellular life. Genes are  
22 often transcribed by multiple RNAPs. While the properties of individual RNAPs are well  
23 appreciated, it remains less explored whether group behaviors can emerge from co-  
24 transcribing RNAPs under most physiological levels of gene expression. Here, we  
25 provide evidence in *Escherichia coli* that well-separated RNAPs can exhibit  
26 collaborative and antagonistic group dynamics. Co-transcribing RNAPs translocate  
27 faster than a single RNAP, but the density of RNAPs has no significant effect on their  
28 average speed. When a promoter is inactivated, RNAPs that are far downstream from  
29 the promoter slow down and experience premature dissociation, but only in the  
30 presence of other co-transcribing RNAPs. These group behaviors depend on  
31 transcription-induced DNA supercoiling, which can also mediate inhibitory dynamics  
32 between RNAPs from neighboring divergent genes. Our findings suggest that  
33 transcription on topologically-constrained DNA, a norm across organisms, can provide  
34 an intrinsic mechanism for modulating the speed and processivity of RNAPs over long  
35 distances according to the promoter's on/off state.

36

## 37 **Keywords**

38 Transcription elongation, DNA supercoiling, group behaviors, gene regulation,  
39 premature termination

40

41

## 42 INTRODUCTION

43 RNA polymerases (RNAPs) carry out the first step of gene expression by transcribing  
44 DNA into RNA. Inside cells, a gene is often transcribed by multiple RNAPs. Therefore, it  
45 is important to understand not only how a single RNAP transcribes a gene, but how  
46 multiple RNAPs transcribe a gene together. Do co-transcribing RNAPs translocate  
47 faster (or slower) or dissociate less (or more) frequently than a solo RNAP? If so, what  
48 is the mechanism underlying the emergence of the group behavior?

49 Experiments have shown that when an RNAP runs into a stalled RNAP (arrested  
50 by a roadblock or a sequence-specific pause site) it can effectively ‘push’ the paused  
51 RNAP (Epshtein and Nudler, 2003; Epshtein et al., 2003; Jin et al., 2010; Saeki and  
52 Svejstrup, 2009). This ‘RNAP push’ occurs because a trailing RNAP can prevent a  
53 paused RNAP from backtracking or help shift the equilibrium of a backtracked RNAP  
54 towards translocation. Since RNAPs often pause temporarily (Landick, 2006), the  
55 ‘RNAP push’ effect can increase the apparent transcription elongation rate by reducing  
56 pause duration. This model proposes that the rate of transcription elongation increases  
57 with the density of RNAPs on the DNA template and therefore with the rate of  
58 transcription initiation due to additive ‘RNAP push’ effects (Epshtein and Nudler, 2003;  
59 Epshtein et al., 2003). This local cooperation between RNAPs is thought to be most  
60 effective for genes with very strong promoters (Epshtein and Nudler, 2003; Proshkin et  
61 al., 2010; Saeki and Svejstrup, 2009), such as ribosomal genes, where elongating  
62 RNAPs are close to each other due to frequent back-to-back loading onto the DNA  
63 (Voulgaris et al., 1999).

64 The evidence for the elongation rate increasing with the initiation rate through  
65 cumulated ‘RNA pushes’ primarily stems from observations made using a promoter (T7  
66 A1) whose strength approaches that of maximally induced ribosomal promoters  
67 (Deuschle et al., 1986). Comparatively, the vast majority of genes across cell types  
68 have much weaker promoters (see Figure S1 for *Escherichia coli*) (Bon et al., 2006;  
69 Pelechano et al., 2010; Schwanhäusser et al., 2011; Taniguchi et al., 2010). The  
70 density of RNAPs on the DNA can also greatly vary from gene to gene (Figure S1)  
71 (Larson et al., 2014; Mayer et al., 2015; Min et al., 2011; Mokry et al., 2012; Mooney et

72 al., 2009; Pelechano et al., 2009; Vijayan et al., 2011; Wade and Struhl, 2004), implying  
73 that RNAPs can be separated by a wide range of distances during transcription  
74 elongation. Under these physiological contexts, it remains unknown whether RNAPs  
75 traveling at a distance affect each other and therefore show group behavior. It is  
76 generally assumed, without concrete experimental evidence, that well-separated  
77 RNAPs transcribe a gene the same way as a single RNAP transcribes a gene by itself.

78 In this study, we examine whether co-transcribing RNAPs can display group  
79 behaviors under transcription initiation rates commonly found among *E. coli* genes. We  
80 provide evidence that under a wide range of physiological gene expression levels, the  
81 rate of transcription elongation does not change with the rate of transcription initiation,  
82 suggesting that the ‘RNAP push’ mechanism has a negligible effect on overall RNAP  
83 speed under these conditions. However, transcription elongation efficiency of already  
84 transcribing RNAPs becomes compromised when the loading of new RNAPs stops due  
85 to promoter inactivation. This occurs independent of how active the promoter was  
86 before being turned off, as long as there were more than one RNAP on the DNA  
87 template. These contrasting results are reconciled by a mechanism in which RNAPs  
88 affect each other over long distances, either positively or negatively, through  
89 transcription-induced DNA supercoiling.

90

91

## 92 **RESULTS AND DISCUSSION**

### 93 **Large changes in transcription initiation rate do not affect the transcription** 94 **elongation rate**

95 To examine how a modulation of the transcription initiation rate may affect the  
96 transcription elongation rate, we used the *lac* operon of *E. coli*, a paradigm of bacterial  
97 gene regulation. The activity of the native *lac* promoter can easily be tuned by varying  
98 the concentrations of the membrane-permeable inducer isopropyl  $\beta$ -D-1-  
99 thiogalactopyranoside (IPTG) (Monod, 1956). This, in effect, modulates the initiation  
100 rate and thus the density of, and the spacing between, co-transcribing RNAPs on the  
101 DNA. In addition, the *lac* promoter can be rapidly shut off by the addition of glucose or

102 orthonitrophenyl- $\beta$ -D-fucoside (ONPF) (Adesnik and Levinthal, 1970). The first gene of  
103 the *lac* operon encodes LacZ, a  $\beta$ -galactosidase whose production can be monitored  
104 using the Miller assay (Miller, 1972). Since translation is coupled to transcription in  
105 bacteria (i.e., the first ribosome follows the RNAP) (Figure S2) (Kohler et al., 2017;  
106 Landick et al., 1985; Miller et al., 1970; Proshkin et al., 2010), the apparent rate of  
107 transcription elongation,  $r$ , can be estimated by dividing the length of the *lacZ* transcript  
108 (3,072 nt) by the time span between IPTG addition and the rise in  $\beta$ -galactosidase  
109 activity (Jin et al., 1992; Kepes, 1969; Schleif et al., 1973).

110 For our Miller assay experiments, we used 0.2 or 1 mM IPTG for maximal  
111 promoter activity and 0.1 and 0.05 mM for intermediate and low activities, respectively  
112 (Figure 1A). Based on genome-wide RNAP profiling (Larson et al., 2014) and reported  
113 initiation rates for the *lac* promoter (So et al., 2011), these promoter activities cover a  
114 range of RNAP densities commonly observed among well-expressed *E. coli* genes that  
115 have important functions in cell physiology (Figure S1). In the 'RNAP push' model,  $r$   
116 increases with RNAP density and hence promoter activity through cumulated 'RNAP  
117 pushes' (Epshtein and Nudler, 2003; Epshtein et al., 2003). Inconsistent with this  
118 expectation, we found that the first functional LacZ enzymes appear at about the same  
119 time under high, intermediate and low IPTG concentrations (intercept with the baseline  
120 in Figures 1B and S3). In other words,  $r$  was similar under all tested promoter activities  
121 (Figure 1C), despite up to ~4-fold reduction in LacZ synthesis (Figure 1A).

122 We verified these results with an independent and more direct method by probing  
123 mRNA synthesis over time using two-color single-molecule fluorescence in situ  
124 hybridization (FISH) microscopy (Iyer et al., 2016). In this assay, 1-kb regions at the 5'  
125 and 3' ends of the *lacZ* mRNA (Z5 and Z3, respectively) were visualized at one-minute  
126 intervals using different fluorescently labeled probes (Figure 1D). This method provides  
127 population-averaged kinetics of transcription elongation based on measurements from  
128 thousands of cells. The shift in time between the rise in Z5 and Z3 signals (Figure 1E)  
129 represents the time required for the first RNAPs to translocate from the 5' to the 3'  
130 probe regions and provides another means for calculating the apparent elongation rate  
131 (Iyer et al., 2016). Using this approach, we found that  $r$  was identical under maximal (0.2

132 mM) and low (0.05 mM) IPTG induction conditions (Figure 1F), in good quantitative  
133 agreement with the Miller assay data (Figure 1C).

134 Our results indicate that modulating the rate of transcription initiation by several  
135 folds does not affect the rate of transcription elongation. Under conditions of maximal  
136 induction, the *lacZ* gene has an RNAP density that is lower than that of ribosomal genes,  
137 but higher than that of most other *E. coli* genes (Figure S1). Thus, the RNAP density  
138 produced by the fully induced *lac* promoter is already too low to produce a cumulated  
139 ‘RNAP push’ effect large enough to significantly alter the apparent rate of elongation.

140

### 141 **Turning off an active promoter results in apparent slowdown of transcribing** 142 **RNAPs**

143 The lack of correlation between initiation and elongation rates under common levels of  
144 gene expression feeds into the general assumption that well-separated RNAPs do not  
145 affect each other’s motion. If this assumption is true, turning off an active promoter—a  
146 common natural occurrence when the environment changes—should not have any  
147 effect on the apparent elongation rate of already-loaded RNAPs. To our surprise, this is  
148 not what we observed. Since our assays report on the transcription elongation rate of  
149 the first loaded RNAPs after IPTG induction, we shut off the promoter before the first  
150 RNAPs reached the end of the *lacZ* gene by adding an anti-inducer, ONPF or glucose,  
151 90 s after induction with 0.2 or 0.05 mM IPTG. At both IPTG concentrations, LacZ  
152 synthesis was significantly delayed following promoter inactivation (Figures 2A and S4).  
153 Under these conditions, we detected functional LacZ only at  $t \approx 160$  s, compared to  $t \approx$   
154 110 s when the promoter remained active, indicating an overall decrease in  $r$  (Figure  
155 2B). Since the conditions were the same for the first 90 s, these results imply that it took  
156 about three times longer ( $160 \text{ s} - 90 \text{ s} = 70 \text{ s}$  vs.  $110 \text{ s} - 90 \text{ s} = 20 \text{ s}$ ) for the first  
157 RNAPs to complete *lacZ* transcription following promoter inactivation. This result is  
158 remarkable because the first RNAPs were over 2 kb away from the promoter (based on  
159 their average elongation rate) when the promoter was turned off, indicating that the  
160 ON/OFF state of the promoter has a long-distance effect on transcribing RNAPs. This  
161 long-distance effect was not associated with the particularities of ONPF or glucose

162 inhibition, as a decrease in  $r$  was also observed when the promoter was turned off with  
163 rifampicin (Figure S5A).

164 Could promoter inactivation somehow cause the formation of a long-lived pause  
165 near the end of the *lacZ* gene? If it did, shutting off the promoter earlier, such as at  $t =$   
166 45 s instead of 90 s, would result in the same delay, as the RNAPs should only  
167 experience this pause when they reach that pause site near the end of the gene. If,  
168 instead, the apparent RNAP slowdown is not linked to the formation of a specific pause,  
169 but occurs immediately or shortly after promoter inactivation, turning off the promoter  
170 earlier should further delay the first appearance of LacZ activity. We observed the latter  
171 (Figure S6), arguing against the formation of a specific pause site and arguing in favor  
172 of an apparent slowdown of RNAPs immediately after the promoter is turned off.

173 We confirmed the long-distance effect of the promoter shut-off on transcription  
174 elongation using FISH microscopy experiments in which the promoter either remained  
175 on or was turned off with glucose 90 s after addition of 0.2 mM IPTG. The Z5 mRNA  
176 signal appeared at the 1-min time point in both cases (Figure 2C). The same timing was  
177 expected, as it occurred before glucose addition. However, the first appearance of the  
178 Z3 mRNA signal was delayed from the 2-min time point to the 3-min time point when the  
179 promoter was shut off compared to when it remained active (Figure 2C). This delay  
180 reflects a reduction in  $r$  (Figure 2D), in agreement with the Miller assay results (Figure  
181 2B). We obtained similar results with 0.05 mM IPTG (Figures 2C, 2D and S5B),  
182 indicating that the observed decrease in apparent elongation rate is insensitive to a  
183 large change in the density of RNAPs loaded onto the DNA template.

184 These observations were recapitulated in a  $\Delta lacYA$  strain (Figure S7), thereby  
185 ruling out any potential effect from the expression of downstream genes *lacY* and *lacA*  
186 (e.g., LacY-dependent positive feedback on transcription initiation (Novick and Weiner,  
187 1957; Ozbudak et al., 2004)). The delay in *lacZ* transcription upon promoter inactivation  
188 was also independent of the genomic context, as it was reproduced in a strain in which  
189 the *lac* operon is expressed from a plasmid instead of its native chromosomal locus  
190 (Figure S8).

191  
192

193 **The apparent RNAP slowdown in response to promoter inactivation occurs in**  
194 **vitro with the minimal set of components needed for transcription**

195 To examine whether our promoter shut-off observations are linked to an inherent  
196 property of transcription (i.e., independent of other cellular processes), we turned to an  
197 in vitro transcription assay. For this, we used a plasmid containing the original *lac*  
198 operon sequence with a two-base mutation in the promoter (*lacUV5*), which is  
199 commonly used in in vitro studies because it does not require an activator protein (CAP)  
200 for full promoter activity (Noel and Reznikoff, 2000). Since transcription is independent  
201 of IPTG in vitro (no LacI repressor), expression from the *lacUV5* promoter was induced  
202 by adding purified *E. coli* RNAPs to the reactions. We found that shutting off the  
203 promoter with rifampicin before the first RNAPs completed *lacZ* transcription  
204 significantly reduced their apparent speed in vitro (Figure 3A), despite the absence of  
205 ribosomes or other cellular factors apart from RNAPs and the plasmid template. This  
206 suggests that the reduced efficiency of transcription elongation observed in vivo results  
207 from an intrinsic property of transcription.

208

209 **Transcription-induced DNA supercoiling mediates two modes of transcription**  
210 **elongation depending on the promoter's ON/OFF state**

211 How can shutting off a promoter rapidly affect the translocation of RNAPs that are so far  
212 away from the promoter? We hypothesized that the apparent slowdown of transcription  
213 elongation after promoter inactivation may be related to DNA supercoiling intrinsically  
214 generated by RNAPs as they transcribe a topologically constrained DNA template (i.e.,  
215 a template that cannot rotate). During transcription, individual RNAPs generate negative  
216 DNA supercoiling upstream while creating positive DNA supercoiling downstream (Liu  
217 and Wang, 1987). On the other hand, it has been shown that accumulation of either  
218 negative DNA supercoils upstream (Ma et al., 2013) or positive DNA supercoils  
219 downstream of an RNAP (Chong et al., 2014; Ma et al., 2013; Rovinskiy et al., 2012)  
220 inhibits the translocation of this polymerase. We reasoned that when two RNAPs  
221 transcribe on a DNA template, negative and positive DNA supercoils between RNAPs  
222 may cancel out (Figure 3B), as previously hypothesized (Guptasarma, 1996; Liu and  
223 Wang, 1987). Therefore, we envisioned that DNA supercoil cancellation by neighboring



224 RNAPs would reduce torsional stress, promoting a more ‘fluid’ mode of transcription  
225 elongation (Figure 3B, left). Cancellation requires both positive and negative DNA  
226 supercoils to be produced by RNAP translocation, suggesting that RNAP motion is  
227 important. In other words, the motion of an RNAP would help that of the next RNAP.  
228 DNA supercoil cancellation would also occur between distantly-spaced polymerases  
229 because DNA supercoils can quickly diffuse over long distances (van Loenhout et al.,  
230 2012). In this context, sustained loading of RNAPs would be important as it would  
231 ensure that the level of negative DNA supercoiling behind the last-loaded RNAP (i.e.,  
232 the one closest to the promoter) does not accumulate beyond an inhibitory threshold  
233 (Figure 3B, top).

234         Such a ‘fluid’ mode of transcription elongation would be abrogated when the  
235 loading of new RNAPs stops (i.e., when the promoter is turned off). Accumulation of  
236 negative DNA supercoils behind the last-loaded RNAP would cause it to slow down or  
237 stall. This slower RNAP would then generate fewer positive DNA supercoils  
238 downstream, reducing its long-distance assistance on the translocation of the nearest  
239 downstream RNAP through DNA supercoil cancellation. A slowdown or stalling of this  
240 downstream RNAP would then have the same negative effect on the translocation of  
241 the next RNAP, and so forth. As a result, the disruptive torsional effect on the  
242 translocation of the last-loaded RNAP would rapidly propagate to RNAPs far  
243 downstream, creating a ‘torsionally stressed’ mode of elongation (Figure 3B, bottom).  
244 Under this mode, the slowdown of an RNAP would promote the slowdown of other  
245 RNAPs on the DNA, meaning that RNAPs negatively impact each other when the  
246 promoter is turned off.

247         Consistent with our hypothesis, adding type I topoisomerase (Topo I) to the in  
248 vitro transcription reaction to remove negative DNA supercoils resulted in similar  
249 average elongation rates regardless of whether the promoter remained active or was  
250 turned off by rifampicin (Figure 3C). We note that the elongation rate with the  
251 constitutively active promoter (no rifampicin) was lower in the presence of Topo I than in  
252 its absence (Figure 3C vs. Figure 3A). One possible explanation is that Topo I not only  
253 removes the accumulated negative DNA supercoils behind the last RNAP when the  
254 promoter is turned off, but also removes negative DNA supercoils in-between RNAPs

255 before they can cancel out with positive DNA supercoils generated by the nearby RNAP.  
256 An accumulation of positive DNA supercoils also creates torsional stress that impacts  
257 RNAP translocation (Chong et al., 2014; Ma et al., 2013; Rovinskiy et al., 2012),  
258 explaining the lower  $r$  value in the presence of Topo I. To circumvent this problem and  
259 prevent accumulation of any type of DNA supercoils, we linearized the plasmid, thereby  
260 allowing its free rotation during transcription elongation. Indeed, linearization of the DNA  
261 template restored the higher rate of transcription elongation as well as abrogated any  
262 effect that turning off the promoter had on the elongation rate (Figure 3C). These results  
263 indicate that DNA supercoiling coordinates the change in elongation dynamics  
264 according to the ON/OFF state of the promoter.

265 Altogether, our results support a model in which co-transcribing RNAPs aid each  
266 other's translocation over a long distance through DNA supercoiling cancellation as long  
267 as the promoter continues to supply new RNAPs onto the gene. This positive interaction  
268 between RNAPs over long distances is *not* cumulative in that it is independent of RNAP  
269 density *as long as* positive and negative DNA supercoils between RNAPs can diffuse  
270 toward each other and cancel out. This 'fluid' mode of transcription elongation would  
271 explain why the apparent rate of transcription elongation on *lacZ* is the same at maximal  
272 (0.2 mM IPTG) and low (0.05 mM) levels of induction (Figure 1). Based on RNAP  
273 density comparison (Figure S1), most well-expressed *E. coli* genes, including those  
274 involved in critical aspects of cellular physiology, are expected to experience a 'fluid'  
275 mode of transcription elongation as well.

276

### 277 **A solo RNAP displays a slower apparent speed than multiple co-transcribing** 278 **RNAPs and is not affected by promoter inactivation**

279 According to our model, if there is only a single RNAP per template, as expected for  
280 repressed or weakly expressed genes, the absence of torsional stress relief from co-  
281 transcribing RNAPs through DNA supercoiling cancellation should result in a reduced  
282 transcription elongation rate. This is, indeed, what we observed in Miller and FISH  
283 experiments when *lacZ* expression was induced with only 0.02 mM IPTG (Figures 4A-  
284 4D). Under this very low induction condition, only a single RNAP is present on the *lacZ*  
285 template, based on the observation that the number of Z5 mRNAs per fluorescent spot

286 does not increase over time following IPTG induction, unlike at higher IPTG  
287 concentrations (Figure 4E).

288 A single RNAP was also largely insensitive to promoter activity, as we did not  
289 observe a significant delay in LacZ activity appearance when the *lac* promoter was  
290 turned off 90 s after induction with 0.02 mM IPTG (Figures 4F and S9). The apparent  
291 rate of transcription elongation was similar ( $P$  value = 0.42 from two-tailed  $t$  test)  
292 regardless of the promoter's ON/OFF state (Figure 4G). Thus, the apparent slow-down  
293 in transcription elongation when the promoter is turned off is not a property of a single  
294 RNAP; instead, it is an emergent property of an RNAP group.

295

### 296 **Promoter shut-off promotes premature transcription termination**

297 A significantly lower rate of transcription elongation often means longer or more  
298 frequent RNAP pauses and more efficient transcription termination (Fisher and  
299 Yanofsky, 1983; Guarente and Beckwith, 1978; Jin et al., 1992; Kotlajich et al., 2015;  
300 McDowell et al., 1994; Peters et al., 2011; Yanofsky and Horn, 1981). Thus, a potential  
301 functional consequence of RNAP stalling following the repression of an active promoter  
302 may be an increase in premature transcription termination. Time-course analysis of  
303 FISH data revealed that, under continuous induction, the Z5 and Z3 signals reached a  
304 similar plateau at steady state (Figure 5A), leading to a Z3/Z5 ratio close to 1 for various  
305 IPTG concentrations (Figure 5B). Since the degradation rates of the Z3 and Z5 regions  
306 were the same (with a mean lifetime of ~1.5 min, Figure S10), these results indicate that  
307 premature termination during *lacZ* transcription is negligible when the promoter remains  
308 active, as previously reported (Iyer et al., 2016). In contrast, when the promoter was  
309 shut off at 90 s, only ~50% of the RNAPs that transcribed the Z5 probe region reached  
310 the Z3 region (Figures 5C and 5D). Thus, a reduced elongation rate in response to a  
311 block in transcription initiation is associated with a significant increase in premature  
312 dissociation of the already-loaded RNAPs. For polycistronic genes, such as the *lac*  
313 operon, this premature transcription termination also suppresses the expression of  
314 downstream genes. In nature, where bacteria experience rapidly changing  
315 environments, this premature termination of transcription would be advantageous, as

316 cells can more quickly stop the production of unneeded proteins when the inducing  
317 conditions disappear.

318

### 319 **Expression from a gene can impact the transcription elongation rate of a** 320 **divergently transcribed gene**

321 Our proposed mechanism may also have implications for neighboring genes. It is  
322 already established that negative DNA supercoiling created during transcription can  
323 promote the local unwinding of DNA and facilitate transcription initiation of a neighboring  
324 gene if it is transcribed in the opposite direction (Dunaway and Ostrander, 1993; Meyer  
325 and Beslon, 2014; Naughton et al., 2013b; Opel and Hatfield, 2001; Rhee et al., 1999).  
326 Our model suggests that negative DNA supercoiling created by RNAP translocation on  
327 a gene may also reduce the speed of RNAPs on a neighboring divergent gene.

328 To test this prediction, we inserted *gfp*, driven by either a strong or a weak  
329 promoter, between *lacI* and *lacZ* on a plasmid in the  $\Delta lacZYA$  strain (Figure 6A). Both  
330 promoters were derived from the *E. coli ompA* promoter, which we mutated to modulate  
331 its strength (Figures S11A and S11B). Without IPTG induction, basal LacZ activity was,  
332 as expected, higher when *gfp* was driven by the strong promoter compared to the weak  
333 promoter or the control template lacking *gfp* (Figure S11C). In addition, *gfp* expression  
334 from the strong promoter reduced the apparent transcription elongation rate of *lacZ*  
335 when its expression was induced with 0.2 mM IPTG (Figure 6B), consistent with our  
336 model prediction. Thus, an antagonistic dynamics can also emerge from RNAPs on  
337 separate genes.

338

### 339 **Transcription-induced DNA supercoiling mediates RNAP group behaviors over** 340 **long distances**

341 Previous work has shown that when two RNAPs collide, the trailing RNAP can help the  
342 leading RNAP escape a pause site or overcome an obstacle, such as a DNA-binding  
343 protein or a nucleosome (Epshtein and Nudler, 2003; Epshtein et al., 2003; Jin et al.,  
344 2010; Saeki and Svejstrup, 2009). In this study, we show that co-transcribing RNAPs  
345 also display group behaviors over long (kilobase) distances (i.e., without collisions).  
346 These long-distance group behaviors emerge from two well-established properties of

347 transcription on topologically constrained DNA: 1) the translocation of a single RNAP  
348 generates DNA supercoiling (Liu and Wang, 1987) and 2) DNA supercoiling impedes  
349 the motion of individual RNAPs (Chong et al., 2014; Ma et al., 2013; Rovinskiy et al.,  
350 2012). Our data suggest that these two properties, together with the ability of positive  
351 and negative DNA supercoils to diffuse rapidly over long distances (van Loenhout et al.,  
352 2012), can lead to both positive and negative effects among well-separated RNAPs.

353 Collectively, our data proposes the following model. When the promoter remains  
354 active, the presence of multiple RNAPs on the DNA template results in fluid RNAP  
355 translocation. DNA supercoils created by the translocation of each RNAP are rapidly  
356 cancelled out between RNAPs, relieving torsional stress on these RNAPs and leading  
357 to fast and processive translocation (Figure 3B). This long-distance assistance is not  
358 additive as the mechanism does not benefit from an increase in RNAP density. As a  
359 result, the elongation rate does not increase with the initiation rate as long as there are  
360 multiple RNAPs translocating on the same template (Figure 1). This long-distance  
361 assistance disappears when a single RNAP is transcribing or when an active promoter  
362 shuts off because torsional stress is no longer relieved by DNA supercoiling cancellation  
363 (Figure 3B). This results in slower elongation rates (Figures 2, 3A, and 4). In the case of  
364 promoter inactivation, the negative effect associated with the stalling of the promoter-  
365 proximal RNAP is quickly propagated to downstream RNAPs, as each of them benefits  
366 from the motion of the upstream RNAP for torsional stress relief.

367 Note that the  $r$  values for the promoter shut-off experiments (Figures 2B, 2D, and  
368 3A, S5, S6, S7 and S8) underestimate the reduction in apparent elongation rate when  
369 the promoter becomes inactive. This is because the  $r$  values are calculated from the  
370 time of induction and therefore take into account not only the elongation rate after the  
371 promoter is shut off but also before it was shut off, i.e., when transcription elongation  
372 was fluid and faster. As discussed above (see text related to Figure 2), we estimate that  
373 it takes about three times longer for RNAPs to finish the last ~300 bp of *lacZ*  
374 transcription when the promoter is turned off at 90 s compared to when the promoter  
375 remains active. This implies that the average elongation rate is reduced from ~30 nt/s  
376 down to ~10 nt/s upon promoter inactivation, which is considerably lower than the  
377 average elongation rate of ~20 nt/s for a single RNAP (Figures 4B and 4D). In other

378 words, RNAPs appear to translocate slower than a single RNAP when the promoter is  
379 turned off. How is this possible? We speculate that this is again linked to the ability of  
380 DNA supercoils to diffuse. RNAPs form bulky complexes with nascent transcripts and  
381 their associated ribosomes, and likely act as barriers to DNA supercoil diffusion (Leng et  
382 al., 2011). Therefore, the torsional stress experienced by RNAPs within a group after  
383 promoter inactivation may be higher than that experienced by a single RNAP because  
384 the DNA supercoils created between RNAPs are spatially confined compared to those  
385 created by a single RNAP. Furthermore, spatial confinement of DNA supercoiling may  
386 increase torsional stress due to the formation of a plectoneme (loop of helices twisted  
387 together), as the likelihood of plectoneme formation increases when DNA supercoiling  
388 occurs on shorter DNA segments (Brutzer et al., 2010).

389 The switch from collaborative to antagonistic group behavior following promoter  
390 inactivation is accompanied by a significant increase in premature termination (Figures  
391 5C and 5D), presumably as a result of torsional stress and RNAP stalling. Prior to our  
392 work, the general assumption was that promoter inactivation in response to a change in  
393 intracellular or environmental conditions stops the loading of RNAPs, but does not affect  
394 the already loaded RNAPs. These RNAPs were assumed to continue transcription  
395 elongation normally, creating a wasteful delay between promoter inactivation and  
396 protein synthesis arrest. This would be analogous to stopping a car by taking the foot off  
397 the accelerator and not using the brake. However, our study shows that transcription  
398 from a group of RNAPs provides a built-in brake that more rapidly halts the production  
399 of proteins that are no longer needed.

400 Our data are also consistent with an emergent group function that can negatively  
401 impact RNAPs from divergently expressed gene pairs. If a gene is strongly expressed,  
402 negative DNA supercoils created by RNAP translocation can diffuse and impede the  
403 translocation of RNAPs on the neighboring divergent gene (Figure 6). Given the  
404 prevalence of divergent transcription in genomes (Wei et al., 2011), our result suggests  
405 another potential DNA supercoiling-dependent constraint on chromosomal gene  
406 arrangement during evolution (Meyer et al., 2018; Sobetzko, 2016). Our result also has  
407 implications for genetic engineering. Specifically, if fast transcription elongation is a

408 desired property, one should avoid placing a pair of two strongly expressed genes in  
409 opposite directions.

410 Importantly, transcription-induced DNA supercoiling is a common feature of living  
411 cells across organisms (Giaever and Wang, 1988; Kouzine et al., 2014; Liu and Wang,  
412 1987; Naughton et al., 2013a). Therefore, our findings may be broadly applicable,  
413 including to eukaryotic transcription.

414

415

## 416 **Supplemental Information**

417 Supplemental Information includes eleven figures and five tables.

418

## 419 **Author contributions**

420 S.K. and C.J.-W. designed the study. S.K. performed experiments and S.K., B.B., and  
421 C.J.-W. analyzed and discussed the data. S.K., B.B., and I.I. provided resources. S.K.  
422 and C.J.-W. wrote the manuscript. All authors contributed to its editing.

423

## 424 **Acknowledgements**

425 We thank Drs. Carol Gross, Jonathan Weissman, Matthew Larson, Hendrik Osadnik,  
426 and Jeff Hussmann for helpful discussions and technical help, Drs. Samuel Kou and  
427 Andrei Kuzminov for useful suggestions, Drs. Wayne Wade and Jeorg Bewersdorf for  
428 materials, and Dr. Andrew Goodman for allowing us to use his RT-PCR machine. We  
429 also thank Dr. Patricia Rosa and the members of the Jacobs-Wagner laboratory for  
430 discussions and critical reading of the manuscript. C.J.-W. is an Investigator of the  
431 Howard Hughes Medical Institute.

432

## 433 **Declaration of Interests**

434 The authors declare no competing interests.

435

436

## 437 REFERENCES

- 438 Adesnik, M., and Levinthal, C. (1970). The synthesis and degradation of lactose operon  
439 messenger RNA in *E. coli*. *Cold Spring Harbor Symp. Quant. Biol.* 35, 451-459.
- 440 Bachmann, B.J. (1996). Derivations and genotypes of some mutant derivatives of *Escherichia*  
441 *coli* K-12, Vol 2, 2nd edn (Washington, DC: ASM Press).
- 442 Bon, M., McGowan, S.J., and Cook, P.R. (2006). Many expressed genes in bacteria and yeast  
443 are transcribed only once per cell cycle. *FASEB J.* 20, 1721-1723.
- 444 Bookout, A.L., Cummins, C.L., Mangelsdorf, D.J., Pesola, J.M., and Kramer, M.F. (2006). High  
445 throughput real time quantitative reverse transcription PCR. *Curr. Protoc. Mol. Biol.* 73,  
446 15.18.11-15.18.28.
- 447 Brutzer, H., Luzziotti, N., Klaue, D., and Seidel, R. (2010). Energetics at the DNA supercoiling  
448 transition. *Biophys. J.* 98, 1267-1276.
- 449 Chong, S., Chen, C., Ge, H., and Xie, X.S. (2014). Mechanism of transcriptional bursting in  
450 bacteria. *Cell* 158, 314-326.
- 451 Datsenko, K.A., and Wanner, B.L. (2000). One-step inactivation of chromosomal genes in  
452 *Escherichia coli* K-12 using PCR products. *Proc. Natl. Acad. Sci. USA.* 97, 6640-6645.
- 453 Deuschle, U., Kammerer, W., Gentz, R., and Bujard, H. (1986). Promoters of *Escherichia coli*: a  
454 hierarchy of in vivo strength indicates alternate structures. *EMBO J.* 5, 2987-2994.
- 455 Dunaway, M., and Ostrander, E.A. (1993). Local domains of supercoiling activate a eukaryotic  
456 promoter in vivo. *Nature* 361, 746-748.
- 457 Dykxhoorn, D.M., St. Pierre, R., and Linn, T. (1996). A set of compatible *tac* promoter  
458 expression vectors. *Gene* 177, 133-136.
- 459 Epshtein, V., and Nudler, E. (2003). Cooperation between RNA polymerase molecules in  
460 transcription elongation. *Science* 300, 801-805.
- 461 Epshtein, V., Toulmé, F., Rahmouni, A.R., Borukhov, S., and Nudler, E. (2003). Transcription  
462 through the roadblocks: the role of RNA polymerase cooperation. *EMBO J* 22, 4719-4727.
- 463 Fisher, R.F., and Yanofsky, C. (1983). Mutations of the beta subunit of RNA polymerase alter  
464 both transcription pausing and transcription termination in the *trp* operon leader region in vitro. *J.*  
465 *Biol. Chem.* 258, 8146-8150.
- 466 Giaever, G.N., and Wang, J.C. (1988). Supercoiling of intracellular DNA can occur in eukaryotic  
467 cells. *Cell* 55, 849-856.
- 468 Gibson, D.G., Young, L., Chuang, R.-Y., Venter, J.C., Hutchison Iii, C.A., and Smith, H.O.  
469 (2009). Enzymatic assembly of DNA molecules up to several hundred kilobases. *Nat. Methods*  
470 6, 343-345.
- 471 Griffith, K.L., and Wolf, R.E. (2002). Measuring  $\beta$ -galactosidase activity in bacteria: cell growth,  
472 permeabilization, and enzyme assays in 96-well arrays. *Biochem. Bioph. Res. Co.* 290, 397-402.
- 473 Guarente, L.P., and Beckwith, J. (1978). Mutant RNA polymerase of *Escherichia coli* terminates  
474 transcription in strains making defective rho factor. *Proc. Natl. Acad. Sci. USA.* 75, 294-297.



- 475 Guptasarma, P. (1996). Cooperative relaxation of supercoils and periodic transcriptional  
476 initiation within polymerase batteries. *BioEssays* 18, 325-332.
- 477 Irnov, I., and Winkler, W.C. (2010). A regulatory RNA required for antitermination of biofilm and  
478 capsular polysaccharide operons in Bacillales. *Mol. Microbiol.* 76, 559-575.
- 479 Iyer, S., Park, B.R., and Kim, M. (2016). Absolute quantitative measurement of transcriptional  
480 kinetic parameters in vivo. *Nucleic Acids Res.* 44, e142.
- 481 Jin, D.J., Burgess, R.R., Richardson, J.P., and Gross, C.A. (1992). Termination efficiency at  
482 rho-dependent terminators depends on kinetic coupling between RNA polymerase and rho.  
483 *Proc. Natl. Acad. Sci. USA.* 89, 1453-1457.
- 484 Jin, J., Bai, L., Johnson, D.S., Fulbright, R.M., Kireeva, M.L., Kashlev, M., and Wang, M.D.  
485 (2010). Synergistic action of RNA polymerases in overcoming the nucleosomal barrier. *Nat.*  
486 *Struct. Mol. Biol.* 17, 745-752.
- 487 Jones, D.L., Brewster, R.C., and Phillips, R. (2014). Promoter architecture dictates cell-to-cell  
488 variability in gene expression. *Science* 346, 1533-1536.
- 489 Joo, C., and Ha, T. (2012). Labeling DNA (or RNA) for single-molecule FRET. *Cold Spring*  
490 *Harbor Protocols* 2012, 1005-1008.
- 491 Kepes, A. (1969). Transcription and translation in the lactose operon of *Escherichia coli* studied  
492 by in vivo kinetics. *Prog. Biophys. Mol. Biol.* 19, 199-236.
- 493 Kim, S., and Jacobs-Wagner, C. (2018). Effects of mRNA degradation and site-specific  
494 transcriptional pausing on protein expression noise. *Biophys. J.* 114, 1718-1729.
- 495 Kohler, R., Mooney, R.A., Mills, D.J., Landick, R., and Cramer, P. (2017). Architecture of a  
496 transcribing-translating expressome. *Science* 356, 194-197.
- 497 Kotlajich, M.V., Hron, D.R., Boudreau, B.A., Sun, Z., Lyubchenko, Y.L., and Landick, R. (2015).  
498 Bridged filaments of histone-like nucleoid structuring protein pause RNA polymerase and aid  
499 termination in bacteria. *eLife* 4, e04970.
- 500 Kouzine, F., Levens, D., and Baranello, L. (2014). DNA topology and transcription. *Nucleus* 5,  
501 195-202.
- 502 Landick, R. (2006). The regulatory roles and mechanism of transcriptional pausing. *Biochem.*  
503 *Soc. Trans.* 34, 1062-1066.
- 504 Landick, R., Carey, J., and Yanofsky, C. (1985). Translation activates the paused transcription  
505 complex and restores transcription of the trp operon leader region. *Proc. Natl. Acad. Sci. USA.*  
506 82, 4663-4667.
- 507 Larson, M.H., Mooney, R.A., Peters, J.M., Windgassen, T., Nayak, D., Gross, C.A., Block, S.M.,  
508 Greenleaf, W.J., Landick, R., and Weissman, J.S. (2014). A pause sequence enriched at  
509 translation start sites drives transcription dynamics in vivo. *Science* 344, 1042-1047.
- 510 Leng, F., Chen, B., and Dunlap, D.D. (2011). Dividing a supercoiled DNA molecule into two  
511 independent topological domains. *Proc. Natl. Acad. Sci. USA.* 108, 19973-19978.
- 512 Liu, L.F., and Wang, J.C. (1987). Supercoiling of the DNA template during transcription. *Proc.*  
513 *Natl. Acad. Sci. USA.* 84, 7024-7027.

- 514 Liu, W., and Saint, D.A. (2002). A new quantitative method of real time reverse transcription  
515 polymerase chain reaction assay based on simulation of polymerase chain reaction kinetics.  
516 *Anal. Biochem.* *302*, 52-59.
- 517 Ma, J., Bai, L., and Wang, M.D. (2013). Transcription under torsion. *Science* *340*, 1580-1583.
- 518 Mayer, A., di Iulio, J., Maleri, S., Eser, U., Vierstra, J., Reynolds, A., Sandstrom, R.,  
519 Stamatoyannopoulos, John A., and Churchman, L.S. (2015). Native elongating transcript  
520 sequencing reveals human transcriptional activity at nucleotide resolution. *Cell* *161*, 541-554.
- 521 McDowell, J., Roberts, J., Jin, D., and Gross, C. (1994). Determination of intrinsic transcription  
522 termination efficiency by RNA polymerase elongation rate. *Science* *266*, 822-825.
- 523 Meyer, S., and Beslon, G. (2014). Torsion-mediated interaction between adjacent genes. *PLoS*  
524 *Comp. Biol.* *10*, e1003785.
- 525 Meyer, S., Reverchon, S., Nasser, W., and Muskhelishvili, G. (2018). Chromosomal  
526 organization of transcription: in a nutshell. *Curr. Genet.* *64*, 555-565.
- 527 Miller, J.H. (1972). Assay of  $\beta$ -galactosidase. In *Experiments in molecular genetics* (Cold Spring  
528 Harbor, New York: Cold Spring Harbor Laboratory), pp. 352-355.
- 529 Miller, O.L., Hamkalo, B.A., and Thomas, C.A. (1970). Visualization of bacterial genes in action.  
530 *Science* *169*, 392-395.
- 531 Min, I.M., Waterfall, J.J., Core, L.J., Munroe, R.J., Schimenti, J., and Lis, J.T. (2011). Regulating  
532 RNA polymerase pausing and transcription elongation in embryonic stem cells. *Genes Dev.* *25*,  
533 742-754.
- 534 Mokry, M., Hatzis, P., Schuijers, J., Lansu, N., Ruzius, F.-P., Clevers, H., and Cuppen, E.  
535 (2012). Integrated genome-wide analysis of transcription factor occupancy, RNA polymerase II  
536 binding and steady-state RNA levels identify differentially regulated functional gene classes.  
537 *Nucleic Acids Res.* *40*, 148-158.
- 538 Monod, J. (1956). Remarks on the mechanism of enzyme induction. In *Enzymes: Units of*  
539 *Biological Structure and Function*, O.H. Gaebler, ed. (New York: Academic Press), pp. 7-28.
- 540 Montero Llopis, P., Jackson, A., Sliusarenko, O., Surovtsev, I., Heinritz, J., Emonet, T., and  
541 Jacobs-Wagner, C. (2010). Spatial organization of the flow of genetic information in bacteria.  
542 *Nature* *466*, 77-81.
- 543 Mooney, R.A., Davis, S.E., Peters, J.M., Rowland, J.L., Ansari, A.Z., and Landick, R. (2009).  
544 Regulator trafficking on bacterial transcription units in vivo. *Mol. Cell* *33*, 97-108.
- 545 Naughton, C., Avlonitis, N., Corless, S., Prendergast, J.G., Mati, I.K., Eijk, P.P., Cockroft, S.L.,  
546 Bradley, M., Ylstra, B., and Gilbert, N. (2013a). Transcription forms and remodels supercoiling  
547 domains unfolding large-scale chromatin structures. *Nat. Struct. Mol. Biol.* *20*, 387-395.
- 548 Naughton, C., Corless, S., and Gilbert, N. (2013b). Divergent RNA transcription. *Transcription* *4*,  
549 162-166.
- 550 Noel, R.J., and Reznikoff, W.S. (2000). Structural studies of lacUV5-RNA polymerase  
551 interactions in vitro: ethylation interference and missig nucleoside analysis. *J. Biol. Chem.* *275*,  
552 7708-7712.
- 553 Novick, A., and Weiner, M. (1957). Enzyme induction as an all-or-none phenomenon. *Proc. Natl.*  
554 *Acad. Sci. USA.* *43*, 553-566.

- 555 Opel, M.L., and Hatfield, G.W. (2001). DNA supercoiling-dependent transcriptional coupling  
556 between the divergently transcribed promoters of the *ilvYC* operon of *Escherichia coli* is  
557 proportional to promoter strengths and transcript lengths. *Mol. Microbiol.* **39**, 191-198.
- 558 Ozbudak, E.M., Thattai, M., Lim, H.N., Shraiman, B.I., and Van Oudenaarden, A. (2004).  
559 Multistability in the lactose utilization network of *Escherichia coli*. *Nature* **427**, 737-740.
- 560 Pelechano, V., Chávez, S., and Pérez-Ortín, J.E. (2010). A complete set of nascent  
561 transcription rates for yeast genes. *PLoS One* **5**, e15442.
- 562 Pelechano, V., Jimeno-González, S., Rodríguez-Gil, A., García-Martínez, J., Pérez-Ortín, J.E.,  
563 and Chávez, S. (2009). Regulon-specific control of transcription elongation across the yeast  
564 genome. *PLoS Genet.* **5**, e1000614.
- 565 Peters, J.M., Vangeloff, A.D., and Landick, R. (2011). Bacterial transcription terminators: the  
566 RNA 3'-end chronicles. *J. Mol. Biol.* **412**, 793-813.
- 567 Proshkin, S., Rahmouni, A.R., Mironov, A., and Nudler, E. (2010). Cooperation between  
568 translating ribosomes and RNA polymerase in transcription elongation. *Science* **328**, 504-508.
- 569 Rhee, K.Y., Opel, M., Ito, E., Hung, S.-p., Arfin, S.M., and Hatfield, G.W. (1999). Transcriptional  
570 coupling between the divergent promoters of a prototypic LysR-type regulatory system, the  
571 *ilvYC* operon of *Escherichia coli*. *Proc. Natl. Acad. Sci. USA.* **96**, 14294-14299.
- 572 Rovinskiy, N., Agbleke, A.A., Chesnokova, O., Pang, Z., and Higgins, N.P. (2012). Rates of  
573 gyrase supercoiling and transcription elongation control supercoil density in a bacterial  
574 chromosome. *PLoS Genet.* **8**, e1002845.
- 575 Saeki, H., and Svejstrup, J.Q. (2009). Stability, flexibility, and dynamic interactions of colliding  
576 RNA polymerase II elongation complexes. *Mol. Cell* **35**, 191-205.
- 577 Sawitzke, J.A., Thomason, L.C., Bubunencko, M., Li, X., Costantino, N., and Court, D.L. (2013).  
578 Chapter Seven - Recombineering: Using Drug Cassettes to Knock out Genes in vivo. In  
579 *Methods in Enzymology*, J. Lorsch, ed. (Academic Press), pp. 79-102.
- 580 Schleif, R., Hess, W., Finkelstein, S., and Ellis, D. (1973). Induction Kinetics of the *I*-arabinose  
581 operon of *Escherichia coli*. *J. Bacteriol.* **115**, 9-14.
- 582 Schwanhäusser, B., Busse, D., Li, N., Dittmar, G., Schuchhardt, J., Wolf, J., Chen, W., and  
583 Selbach, M. (2011). Global quantification of mammalian gene expression control. *Nature* **473**,  
584 337-342.
- 585 Sliusarenko, O., Heinritz, J., Emonet, T., and Jacobs-Wagner, C. (2011). High-throughput,  
586 subpixel precision analysis of bacterial morphogenesis and intracellular spatio-temporal  
587 dynamics. *Mol. Microbiol.* **80**, 612-627.
- 588 So, L.-h., Ghosh, A., Zong, C., Sepulveda, L.A., Segev, R., and Golding, I. (2011). General  
589 properties of transcriptional time series in *Escherichia coli*. *Nat. Genet.* **43**, 554-560.
- 590 Sobetzko, P. (2016). Transcription-coupled DNA supercoiling dictates the chromosomal  
591 arrangement of bacterial genes. *Nucleic Acids Res.* **44**, 1514-1524.
- 592 Taniguchi, Y., Choi, P., Li, G., Chen, H., Babu, M., Hearn, J., Emili, A., and Xie, X. (2010).  
593 Quantifying *E. coli* proteome and transcriptome with single-molecule sensitivity in single cells.  
594 *Science* **329**, 533-538.

- 595 van Loenhout, M.T.J., de Grunt, M.V., and Dekker, C. (2012). Dynamics of DNA supercoils.  
596 *Science* 338, 94-97.
- 597 Vijayan, V., Jain, I.H., and O'Shea, E.K. (2011). A high resolution map of a cyanobacterial  
598 transcriptome. *Genome Biol.* 12, R47.
- 599 Voulgaris, J., French, S., Gourse, R.L., Squires, C., and Squires, C.L. (1999). Increased *rrn*  
600 gene dosage causes intermittent transcription of rRNA in *Escherichia coli*. *J. Bacteriol.* 181,  
601 4170-4175.
- 602 Wade, J.T., and Struhl, K. (2004). Association of RNA polymerase with transcribed regions in  
603 *Escherichia coli*. *Proc. Natl. Acad. Sci. USA.* 101, 17777-17782.
- 604 Wei, W., Pelechano, V., Järvelin, A.I., and Steinmetz, L.M. (2011). Functional consequences of  
605 bidirectional promoters. *Trends in Genet.* 27, 267-276.
- 606 Yanofsky, C., and Horn, V. (1981). Rifampin resistance mutations that alter the efficiency of  
607 transcription termination at the tryptophan operon attenuator. *J. Bacteriol.* 145, 1334-1341.
- 608

## 609 **Figure legends**

### 610 **Figure 1. Effect of promoter strength on the rate of transcription elongation.**

611 Expression of *lacZ* in wild-type *E. coli* MG1655 cells grown at 30°C was assayed over  
612 time by Miller assay (A-C) or single-molecule mRNA FISH microscopy (D-F) following  
613 induction with the indicated IPTG concentrations.

614 (A) LacZ activity (after baseline subtraction) measured 4 min after IPTG addition. The  
615 three asterisks denote a statistically significant decrease ( $P < 0.001$ , two-sample *t* test).  
616 Error bars show the standard deviations for at least four experiments.

617 (B) Kinetics of the square root of LacZ activity following IPTG addition. The square root  
618 was used because the LacZ amount is expected to increase as a function of  $t^2$  (Schleif  
619 et al., 1973). Lines and shaded areas indicate the means and standard deviations of  
620 two-line fits (a baseline fit from  $t = 0$  to the appearance of LacZ and a linear fit of the  
621 initial increase in LacZ activity) done on each time-course experiment (example traces  
622 are shown in Figure S3). A total of six, eight, six, and thirteen experiments were  
623 performed for 1, 0.2, 0.1, and 0.05 mM IPTG conditions, respectively.

624 (C) Apparent transcription elongation rate of *lacZ* at indicated IPTG concentrations.  
625 Error bars show the standard deviations of at least three experiments.

626 (D) (Left) Schematic of single-molecule two-color FISH microscopy used to measure  
627 *lacZ* mRNA levels over time. Red and blue dotted lines indicate Cy5 or Cy3B  
628 fluorescently-labeled oligonucleotide probes that hybridize to 1-kb-long 5' and 3' *lacZ*  
629 mRNA regions, or Z5 and Z3, respectively. (Right) Overlay of two fluorescence images  
630 with pseudo-coloring for Cy5 (red) and Cy3B (blue) at indicated time points after IPTG  
631 addition. Data shown at  $t = 0$  correspond to that of a sample collected before IPTG  
632 addition.

633 (E) Z5 and Z3 numbers per cell over time after IPTG addition. Arrows qualitatively show  
634 the time shift in Z3 appearance. Error bars are bootstrapped standard errors of the  
635 mean. At least 1200 cells were analyzed per time point.

636 (F) Effect of different promoter activities on the apparent transcription elongation rate of  
637 *lacZ*, calculated by dividing the distance between the two probe regions (2000 nt) by the

638 time shift between the Z5 and Z3 mRNA signals. Error bars are standard deviations of  
639 five and eight experiments for the 0.2 and 0.05 mM IPTG conditions, respectively.  
640 See also Figures S1, S2, and S3.

641

642 **Figure 2. Effect of promoter inactivation on transcription elongation rate.**

643 (A) Miller assay results showing the kinetics of the square root of LacZ activity  
644 depending on whether the promoter remains induced (ON) or is turned off (OFF). The  
645 promoter was inactivated by addition of 5 mM ONPF or 500 mM glucose at  $t = 90$  s after  
646 induction with 0.05 or 0.2 mM IPTG, respectively. AU, arbitrary units. Lines and shaded  
647 areas indicate the means and standard deviations of two-line fits on each time-course  
648 trace ( $n = 8$  (ON) and 6 (OFF) experiments for 0.2 mM IPTG condition and  $n = 13$  (ON)  
649 and 11 (OFF) experiments for the 0.05 mM IPTG condition).

650 (B) Effect of promoter inactivation on  $r$  measured by Miller assay (as in Figure 1C). \*\*\*  
651 indicates  $P < 0.001$  (two-sample  $t$  test). Error bars show the standard deviations of  
652 replicates described in (A).

653 (C) Z5 and Z3 mRNA numbers per cell over time in FISH microscopy experiments in  
654 which the promoter was turned off (OFF) or not (ON) by addition of 500 mM glucose at  $t$   
655 = 90 s. Black arrows indicate the delay in Z3 appearance from the basal level in the  
656 OFF case relative to the ON case. Over 1200 cells were analyzed per time point. Error  
657 bars are bootstrapped standard errors of the mean.

658 (D) Effect of promoter inactivation on  $r$  measured by two-color mRNA FISH microscopy  
659 as in Figure 2C. Error bars are standard deviations of  $n = 5$  (ON) and 6 (OFF)  
660 experiments for the 0.2 mM IPTG condition and  $n = 8$  (ON) and 15 (OFF) experiments  
661 for the 0.05 mM IPTG condition. \*\* indicates  $P < 0.01$  (two-sample  $t$  test).

662 See also Figures S4, S5, S6, S7, and S8.

663

664 **Figure 3. Effect of DNA supercoiling on *lacZ* transcription kinetics depending on  
665 the promoter's ON/OFF state.**

666 (A) Apparent transcription elongation rate of *lacZ* measured in vitro using a plasmid  
667 containing *lacZYA* driven by the *lacUV5* promoter. At  $t = 0$ , purified *E. coli* RNAP  
668 holoenzyme was added to induce multi-round transcription. At  $t = 30$  s, rifampicin (+Rif)

669 was added or not (-Rif). Error bars are standard deviations of nine (-rif) and seven (+rif)  
670 experiments. \*\*\* indicates  $P < 0.001$  (two-sample  $t$  test).

671 (B) Schematic showing the proposed model for transcription-driven DNA supercoiling  
672 affecting RNAP kinetics depending on whether the promoter remains active or is turned  
673 off. See text for details.

674 (C) Same as (A) except in the presence of Topo I or using the linearized plasmid as a  
675 template. Error bars are standard deviations of four experiments for each condition.

676

677 **Figure 4. Transcription elongation kinetics when the *lac* promoter is minimally**  
678 **induced.**

679 (A) Kinetics of the square root of LacZ activity following IPTG addition. AU, arbitrary  
680 units. Lines and shaded areas indicate the means and standard deviations of two-line  
681 fits on each time-course trace from at least three experiments.

682 (B) Apparent transcription elongation rate of *lacZ* at indicated IPTG concentrations.  
683 Error bars show the standard deviations of at least three experiments. \*\*\* indicates  $P <$   
684  $0.001$  (two-sample  $t$  test). NS indicates a non-significant difference.

685 (C) Z5 and Z3 mRNA numbers per cell over time after 0.02 mM IPTG addition. The  
686 arrow qualitatively shows the time shift in Z3 appearance. Error bars are bootstrapped  
687 standard errors of the mean. At least 7000 cells were analyzed per time point.

688 (D) Effect of different induction levels of *lacZ* expression on the apparent transcription  
689 elongation rate, as calculated from FISH data. Error bars are standard deviations of at  
690 least three experiments. \*\* indicates a statistically significant difference ( $P < 0.01$ , two-  
691 sample  $t$  test). NS indicates a non-significant difference.

692 (E) Distribution of Z5 mRNA numbers in a fluorescent spot inside cells at each time  
693 point for different IPTG concentrations.

694 (F) Kinetics of the square root of LacZ activity when the promoter remained active (ON)  
695 or was turned off (OFF) 90 s after induction with 0.02 mM IPTG. AU, arbitrary units.  
696 Lines and shaded areas indicate the means and standard deviations of two-line fits on  
697 each time-course trace (five and three experiments for ON and OFF conditions,  
698 respectively).

699 (G) Apparent transcription elongation rate of *lacZ* under conditions described in (F).  
700 Error bars show the standard deviations. NS indicates a non-significant difference.  
701 See also Figure S9 and Table S5.

702

703 **Figure 5. Premature dissociation of already-loaded RNAPs following promoter**  
704 **inactivation.**

705 We estimated the fraction of RNAPs that transcribe the Z5 region and also reach the Z3  
706 region by examining the amount of Z5 and Z3 synthesis at the end of the time-course  
707 experiment.

708 (A) Temporal change in the mean Z5 and Z3 mRNA numbers per cell under continuous  
709 induction of *lacZ* expression with 0.05 mM IPTG (promoter “ON”). Over 1500 cells were  
710 analyzed per time point. Error bars are bootstrapped standard errors of the mean.

711 (B) Transcription completion ratio, i.e., ratio of RNAPs completing transcription in (A),  
712 calculated by dividing the Z3 plateau level by that of Z5. Over 7500 cells were analyzed  
713 for each IPTG concentration. Error bars are standard deviations of four, four, and five  
714 experiments for the 0.5, 0.1, and 0.05 mM IPTG conditions, respectively.

715 (C) Accumulation of Z5 and Z3 mRNA numbers per cell when the promoter is turned off  
716 at  $t = 90$  s. The total number of Z5 and Z3 mRNAs made until each time point (solid line)  
717 was calculated from their FISH signals (circles and dotted lines) using eq. 3 (see  
718 Methods). Over 2000 cells were analyzed per time point. Error bars are bootstrapped  
719 standard errors of the mean.

720 (D) Transcription completion ratio, calculated from (C) by dividing the plateau level of Z3  
721 by that of Z5. Error bars are standard deviations of four and six experiments for the 0.2  
722 and 0.05 mM IPTG conditions, respectively. \*\*\* indicates a statistically significant  
723 difference to 1 ( $P < 0.001$ , one-sample  $t$  test).

724 See also Figure S10.

725

726 **Figure 6. Effect of a divergently transcribed gene on *lacZ* transcription elongation.**

727 (A) Schematics of constructs used to test the effect of upstream divergent gene activity  
728 on transcription elongation of *lacZ* (not drawn to scale).



729 (B) Apparent transcription elongation rate of *lacZ* for the different constructs, as  
730 measured by Miller assay under 0.2 mM IPTG induction (as in Figure 1C). The error  
731 bars show the standard deviations of three (no *gfp*), four (weak  $P_{gfp}$ ) and six (strong  $P_{gfp}$ )  
732 experiments. \*\*\* indicates  $P < 0.001$  (two-sample *t* test).  
733 See also Figure S11.

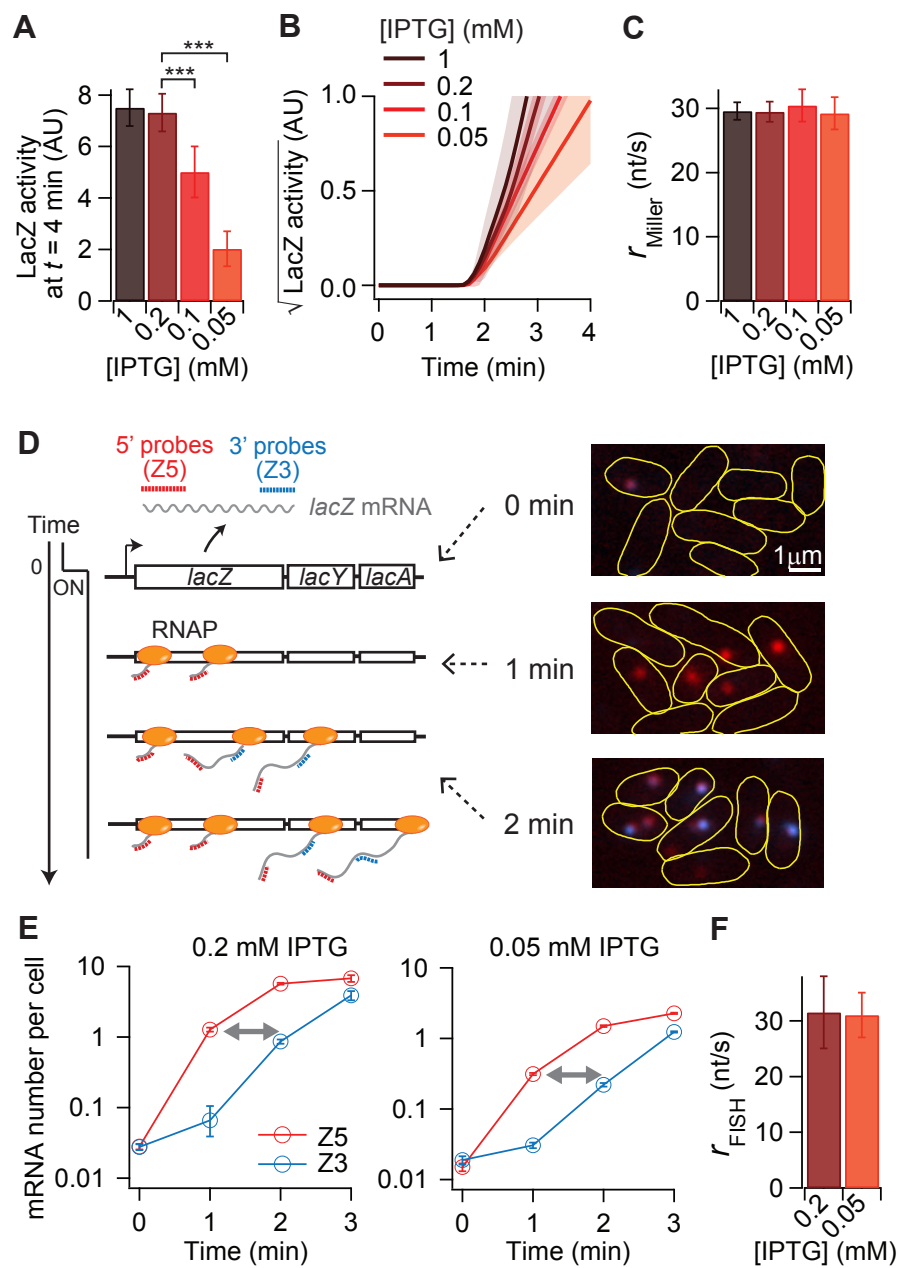

Figure 1

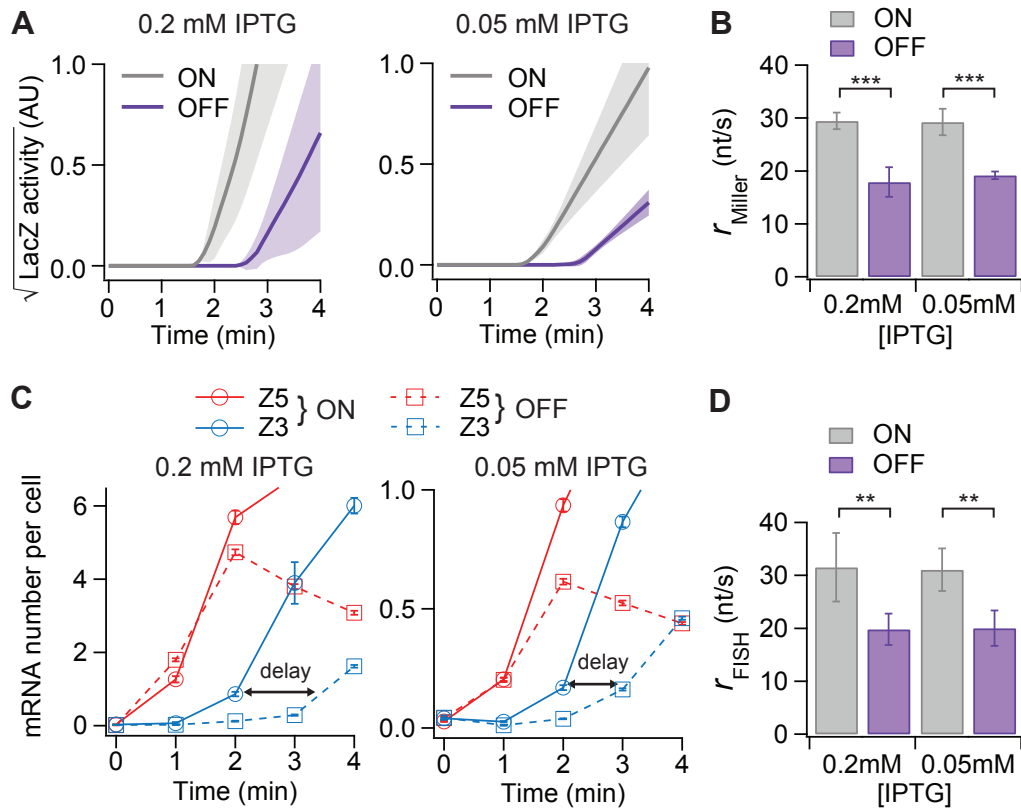

Figure 2

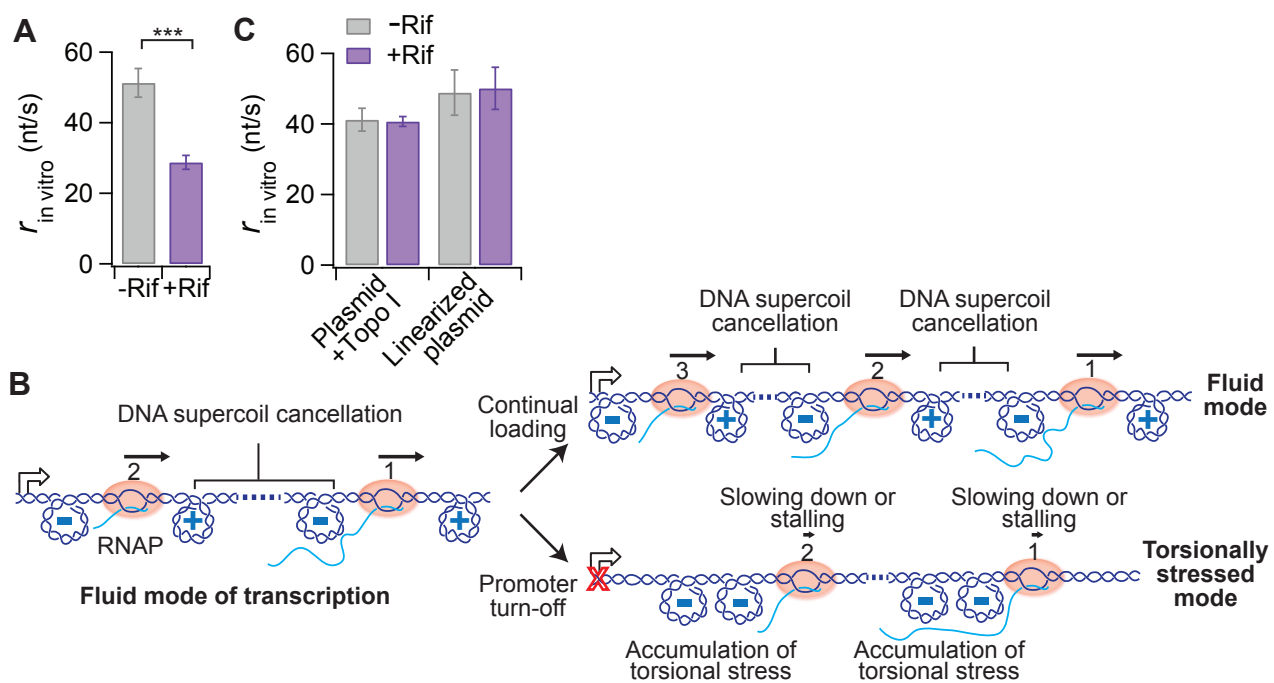

Figure 3

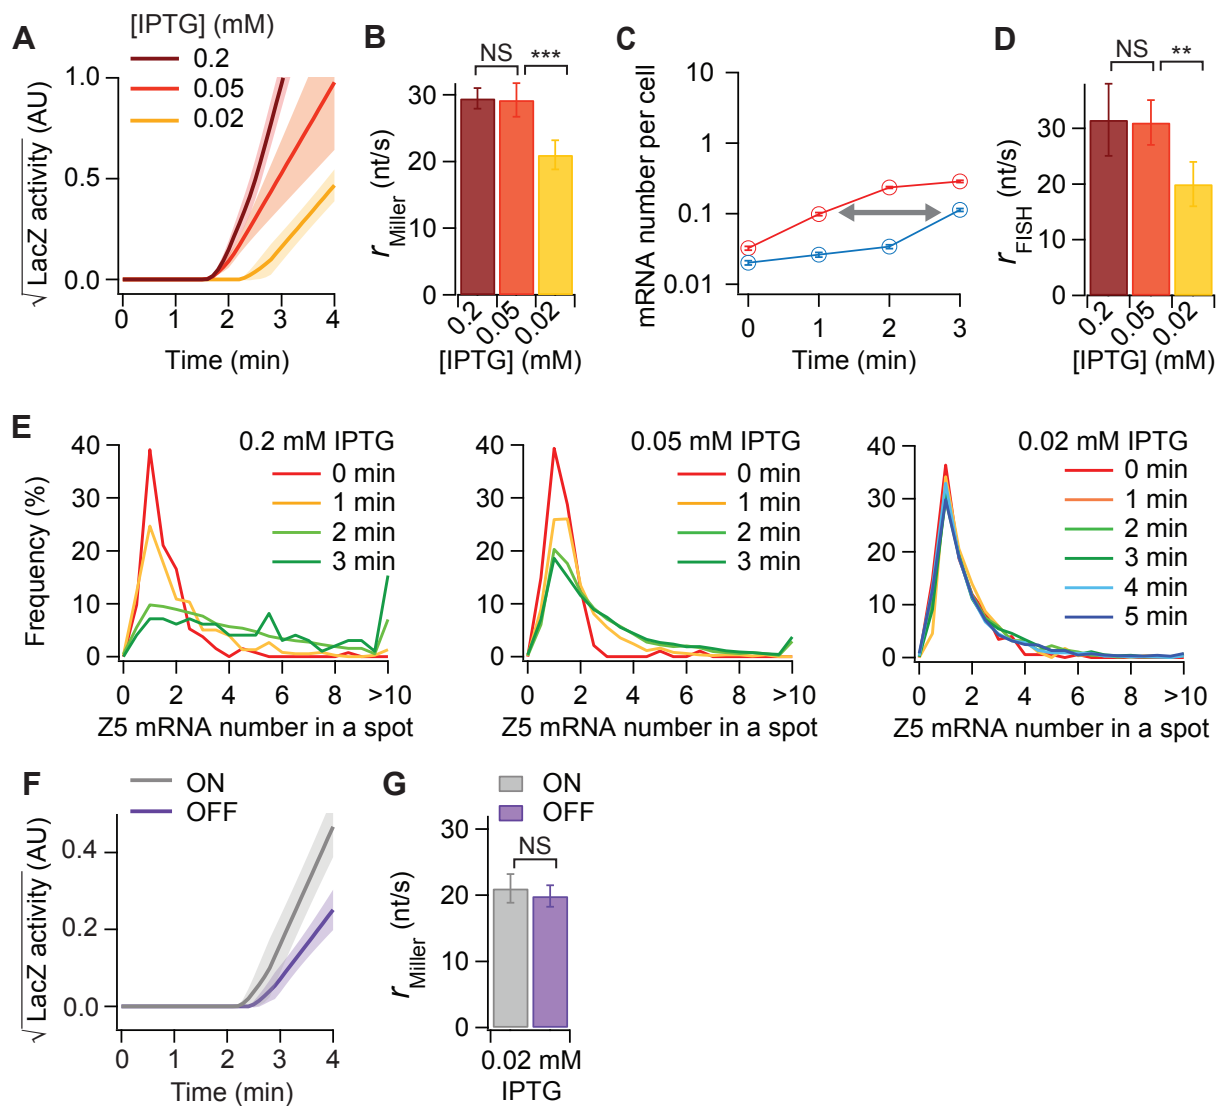

Figure 4

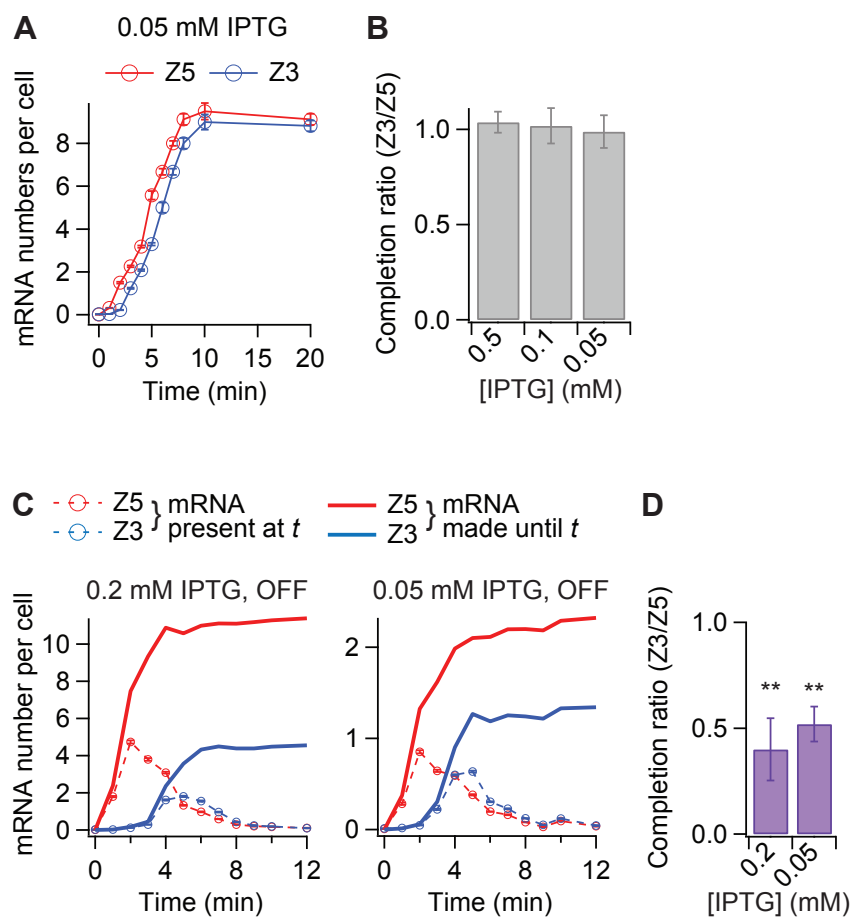

Figure 5

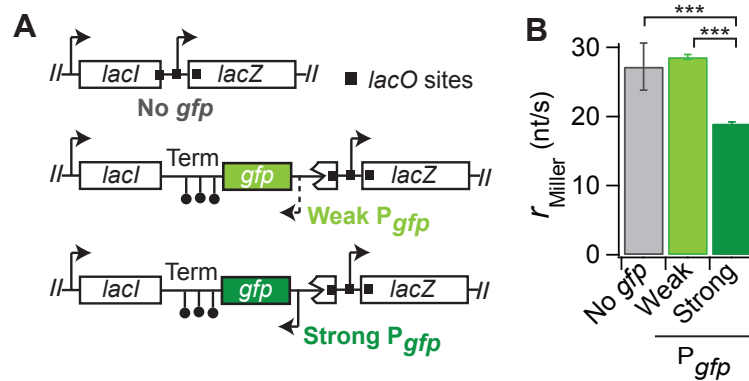

Figure 6
